# Supplementary material for: Elevation of Clavibacter michiganensis subsp. californiensis to species level as Clavibacter californiensis sp. nov., merging and re-classification of Clavibacter michiganensis subsp. chilensis and Clavibacter michiganensis subsp. phaseoli as Clavibacter chilensis sp. nov. based on complete genome in-silico analyses
Source: bioRxiv or medRxiv preprint supplement (doi:10.1101/2022.01.17.476658), 2022-01-18
Supplement: Supplementary file [file media-1.pdf]

## SUPPLEMENTARY DATA

**Table S1.** Detailed list of genomic information of the 76 *Clavibacter* strains retrieved from the NCBI GenBank database and the five *Clavibacter* genomes sequenced in this study (highlighted in light blue color). The strains presented in this table were used for different *in silico* analyses such as MLSA, ANI and *dddH* computation, reconstructed ML phylogenomic tree from core-genome alignment, ANI-based phylogeny, and taxonomy assessment of undefined species in the TYGS platform.

| Former species name in NCBI                                  | Proposed taxonomy       | Strain ID             | Biotope/host                               | Geographic origin | Year isolated | GenBank accession number | Assembly level | Genome size (Mb) | Scaffolds | Sequencing technology           | Genome coverage | Assembly method                       |
|--------------------------------------------------------------|-------------------------|-----------------------|--------------------------------------------|-------------------|---------------|--------------------------|----------------|------------------|-----------|---------------------------------|-----------------|---------------------------------------|
| <i>Clavibacter michiganensis</i> subsp. <i>michiganensis</i> | <i>C. michiganensis</i> | CAYO001               | <i>Solanum lycopersicum</i>                | California, USA   | 2001          | MDHL00000000             | Contig         | 3.33             | 1         | Illumina HiSeq; PacBio          | 100.0x          | SPAdes v. 3.6; SMRT analysis v. 2.2.0 |
| <i>C. m.</i> subsp. <i>michiganensis</i>                     | <i>C. michiganensis</i> | CASJ002               | <i>Solanum lycopersicum</i>                | California, USA   | 1999          | MDHC00000000             | Contig         | 3.28             | 1         | Illumina MiSeq; PacBio          | 100.0x          | SPAdes v. 3.6; SMRT analysis v. 2.2.0 |
| <i>C. m.</i> subsp. <i>michiganensis</i>                     | <i>C. michiganensis</i> | LMG 7333 <sup>T</sup> | <i>Solanum lycopersicum</i>                | Hungary           | 1957          | MZMP00000000             | Contig         | 3.39             | 5         | PacBio                          | 516.0x          | Celera Assembler v. 1                 |
| <i>C. m.</i> subsp. <i>michiganensis</i>                     | <i>C. michiganensis</i> | NCPPB382              | <i>Solanum lycopersicum</i>                | UK                | 1956          | NC_009480                | Complete       | 3.40             | -         | Sanger ABI 3700                 |                 | PHRAP                                 |
| <i>C. m.</i> subsp. <i>michiganensis</i>                     | <i>C. michiganensis</i> | MSF322                | <i>Solanum lycopersicum</i>                | Chile             | 2005          | NZ_CP047051              | Complete       | 3.40             | -         | Hybrid assembly (MiniION/MiSeq) | 139x            | Unicycler v. 0.4.7                    |
| <i>C. m.</i> subsp. <i>michiganensis</i>                     | <i>C. michiganensis</i> | UF1                   | <i>Solanum lycopersicum</i>                | Florida, USA      | 2012          | NZ_CP033724              | Complete       | 3.37             | -         | PacBio                          | 396.0x          | Canu v. 1.5                           |
| <i>C. m.</i> subsp. <i>michiganensis</i>                     | <i>C. michiganensis</i> | VL527                 | <i>Solanum lycopersicum</i>                | Chile             | 2012          | NZ_CP047054              | Complete       | 3.40             | -         | Hybrid assembly (MiniION/MiSeq) | 152x            | Unicycler v. 0.4.7                    |
| <i>C. m.</i> subsp. <i>michiganensis</i>                     | <i>C. michiganensis</i> | VQ143                 | <i>Solanum lycopersicum</i> (plant tissue) | Chile             | 2000          | NZ_CP076352              | Complete       | 3.26             | -         | Hybrid assembly (MiniION/MiSeq) | 547x            | SPAdes v. 3.14.1                      |
| <i>C. m.</i> subsp. <i>michiganensis</i>                     | <i>C. michiganensis</i> | VQ28                  | <i>Solanum lycopersicum</i> (plant tissue) | Chile             | 1996          | NZ_CP076349              | Complete       | 3.36             | -         | Hybrid assembly (MiniION/MiSeq) | 556x            | Unicycler v. 0.4.8                    |

|                                   |                         |            |                                            |                 |      |              |        |      |     |                        |        |                                       |
|-----------------------------------|-------------------------|------------|--------------------------------------------|-----------------|------|--------------|--------|------|-----|------------------------|--------|---------------------------------------|
| <i>C. m. subsp. michiganensis</i> | <i>C. michiganensis</i> | CA00001    | <i>Solanum lycopersicum</i> (plant tissue) | California, USA | 2000 | MDHK00000000 | Contig | 3.47 | 107 | Illumina HiSeq         | 100.0x | SPAdes v. 3.6                         |
| <i>C. m. subsp. michiganensis</i> | <i>C. michiganensis</i> | CA00002    | <i>Solanum lycopersicum</i> (plant tissue) | California, USA | 2000 | MDHM00000000 | Contig | 3.28 | 1   | Illumina HiSeq; PacBio | 100.0x | SPAdes v. 3.6; SMRT analysis v. 2.2.0 |
| <i>C. m. subsp. michiganensis</i> | <i>C. michiganensis</i> | CASJ001    | <i>Solanum lycopersicum</i> (plant tissue) | California, USA | 1999 | MDHB00000000 | Contig | 3.31 | 6   | Illumina MiSeq; PacBio | 90.0x  | SPAdes v. 3.6; SMRT analysis v. 2.2.0 |
| <i>C. m. subsp. michiganensis</i> | <i>C. michiganensis</i> | CASJ003    | <i>Solanum lycopersicum</i> (plant tissue) | California, USA | 1999 | MDHD00000000 | Contig | 3.25 | 423 | Illumina HiSeq         | 100.0x | SPAdes v. 3.6                         |
| <i>C. m. subsp. michiganensis</i> | <i>C. michiganensis</i> | CASJ004    | <i>Solanum lycopersicum</i> (plant tissue) | California, USA | 1999 | MDHE00000000 | Contig | 3.31 | 469 | Illumina HiSeq         | 100.0x | SPAdes v. 3.6                         |
| <i>C. m. subsp. michiganensis</i> | <i>C. michiganensis</i> | CASJ005    | <i>Solanum lycopersicum</i> (plant tissue) | California, USA | 2001 | MDHF00000000 | Contig | 3.20 | 313 | Illumina MiSeq         | 90.0x  | SPAdes v. 3.6                         |
| <i>C. m. subsp. michiganensis</i> | <i>C. michiganensis</i> | CASJ006    | <i>Solanum lycopersicum</i> (plant tissue) | California, USA | 2002 | MDHG00000000 | Contig | 3.37 | 2   | Illumina MiSeq; PacBio | 100.0x | SPAdes v. 3.6; SMRT analysis v. 2.2.0 |
| <i>C. m. subsp. michiganensis</i> | <i>C. michiganensis</i> | CASJ007    | <i>Solanum lycopersicum</i> (plant tissue) | California, USA | 2011 | MDHH00000000 | Contig | 3.35 | 10  | Illumina MiSeq; PacBio | 100.0x | SPAdes v. 3.6; SMRT analysis v. 2.2.0 |
| <i>C. m. subsp. michiganensis</i> | <i>C. michiganensis</i> | CASJ008    | <i>Solanum lycopersicum</i> (plant tissue) | California, USA | 2002 | MDHI00000000 | Contig | 3.39 | 32  | Illumina HiSeq         | 90.0x  | SPAdes v. 3.6                         |
| <i>C. m. subsp. michiganensis</i> | <i>C. michiganensis</i> | ARZ28      | <i>Solanum lycopersicum</i> (plant tissue) | USA             | 2000 | QLNE00000000 | Contig | 3.28 | 434 | Illumina HiSeq         | 174.0x | SPAdes v. 3.11                        |
| <i>C. m. subsp. michiganensis</i> | <i>C. michiganensis</i> | ATCC 10202 | <i>Solanum lycopersicum</i> (plant tissue) | ?               | 1946 | QLMX00000000 | Contig | 3.28 | 334 | Illumina HiSeq         | 192.0x | SPAdes v. 3.11                        |
| <i>C. m. subsp. michiganensis</i> | <i>C. michiganensis</i> | ATCC 14456 | <i>Solanum lycopersicum</i> (plant tissue) | Italy           | 1961 | QLMU00000000 | Contig | 3.30 | 41  | Illumina HiSeq         | 250.0x | SPAdes v. 3.11                        |
| <i>C. m. subsp. michiganensis</i> | <i>C. michiganensis</i> | CFBP 1465  | <i>Solanum lycopersicum</i> (plant tissue) | France          | 1975 | QLMV00000000 | Contig | 3.33 | 66  | Illumina HiSeq         | 111.0x | SPAdes v. 3.11                        |
| <i>C. m. subsp. michiganensis</i> | <i>C. michiganensis</i> | CFBP 1940  | <i>Solanum lycopersicum</i> (plant tissue) | Spain           | 1978 | QLMW00000000 | Contig | 3.30 | 35  | Illumina HiSeq         | 152.0x | SPAdes v. 3.11                        |

|                                   |                         |           |                                            |             |      |              |        |      |     |                |        |                                      |
|-----------------------------------|-------------------------|-----------|--------------------------------------------|-------------|------|--------------|--------|------|-----|----------------|--------|--------------------------------------|
| <i>C. m. subsp. michiganensis</i> | <i>C. michiganensis</i> | CFBP 2494 | <i>Solanum lycopersicum</i> (plant tissue) | Algeria     | 1984 | QLMY00000000 | Contig | 3.32 | 39  | Illumina HiSeq | 120.0x | SPAdes v. 3.11                       |
| <i>C. m. subsp. michiganensis</i> | <i>C. michiganensis</i> | CFBP 2500 | <i>Solanum lycopersicum</i> (plant tissue) | Algeria     | 1984 | QLMZ00000000 | Contig | 3.31 | 332 | Illumina HiSeq | 139.0x | SPAdes v. 3.11                       |
| <i>C. m. subsp. michiganensis</i> | <i>C. michiganensis</i> | CFBP 4999 | <i>Solanum lycopersicum</i> (plant tissue) | Hungary     | 1957 | RDQW00000000 | Contig | 3.37 | 40  | Illumina HiSeq | 150.0x | Velvet v. 1.2.02; SOAPdenovo v. 2.04 |
| <i>C. m. subsp. michiganensis</i> | <i>C. michiganensis</i> | CFBP 5842 | <i>Solanum lycopersicum</i> (plant tissue) | Brazil      | 1993 | QLNA00000000 | Contig | 3.34 | 127 | Illumina HiSeq | 95.0x  | SPAdes v. 3.11                       |
| <i>C. m. subsp. michiganensis</i> | <i>C. michiganensis</i> | CFBP 6885 | <i>Solanum lycopersicum</i> (plant tissue) | France      | 2004 | QLML00000000 | Contig | 3.33 | 25  | Illumina HiSeq | 139.0x | SPAdes v. 3.11                       |
| <i>C. m. subsp. michiganensis</i> | <i>C. michiganensis</i> | CFBP 7158 | <i>Solanum lycopersicum</i> (plant tissue) | New Zealand | 1968 | QLNB00000000 | Contig | 3.29 | 23  | Illumina HiSeq | 216.0x | SPAdes v. 3.11                       |
| <i>C. m. subsp. michiganensis</i> | <i>C. michiganensis</i> | CFBP 7311 | <i>Solanum lycopersicum</i> (plant tissue) | Morocco     | 1989 | QLNC00000000 | Contig | 3.30 | 46  | Illumina HiSeq | 142.0x | SPAdes v. 3.11                       |
| <i>C. m. subsp. michiganensis</i> | <i>C. michiganensis</i> | CFBP 7312 | <i>Solanum lycopersicum</i> (plant tissue) | China       | 1998 | QLND00000000 | Contig | 3.32 | 43  | Illumina HiSeq | 216.0x | SPAdes v. 3.11                       |
| <i>C. m. subsp. michiganensis</i> | <i>C. michiganensis</i> | CFBP 7314 | <i>Solanum lycopersicum</i> (plant tissue) | USA         | 2002 | QLMM00000000 | Contig | 3.27 | 30  | Illumina HiSeq | 154.0x | SPAdes v. 3.11                       |
| <i>C. m. subsp. michiganensis</i> | <i>C. michiganensis</i> | CFBP 7315 | <i>Solanum lycopersicum</i> (plant tissue) | USA         | 1998 | QLMN00000000 | Contig | 3.31 | 31  | Illumina HiSeq | 168.0x | SPAdes v. 3.11                       |
| <i>C. m. subsp. michiganensis</i> | <i>C. michiganensis</i> | CFBP 7316 | <i>Solanum lycopersicum</i> (plant tissue) | USA         | 1998 | QLMO00000000 | Contig | 3.26 | 29  | Illumina HiSeq | 138.0x | SPAdes v. 3.11                       |
| <i>C. m. subsp. michiganensis</i> | <i>C. michiganensis</i> | CFBP 7488 | <i>Solanum lycopersicum</i> (plant tissue) | France      | 2008 | QLMP00000000 | Contig | 3.30 | 55  | Illumina HiSeq | 127.0x | SPAdes v. 3.11                       |
| <i>C. m. subsp. michiganensis</i> | <i>C. michiganensis</i> | CFBP 7568 | <i>Solanum lycopersicum</i> (plant tissue) | USA         | 2000 | QLMQ00000000 | Contig | 3.35 | 61  | Illumina HiSeq | 140.0x | SPAdes v. 3.11                       |
| <i>C. m. subsp. michiganensis</i> | <i>C. michiganensis</i> | CFBP 7589 | <i>Solanum lycopersicum</i> (plant tissue) | Belgium     | 1998 | QLMR00000000 | Contig | 3.32 | 35  | Illumina HiSeq | 297.0x | SPAdes v. 3.11                       |

|                                    |                          |                        |                                            |                 |      |                   |          |      |     |                                 |          |                               |
|------------------------------------|--------------------------|------------------------|--------------------------------------------|-----------------|------|-------------------|----------|------|-----|---------------------------------|----------|-------------------------------|
| <i>C. m. subsp. michiganensis</i>  | <i>C. michiganensis</i>  | NZ1811                 | <i>Solanum lycopersicum</i> (plant tissue) | New Zealand     | 1967 | QLMS00000000      | Contig   | 3.27 | 333 | Illumina HiSeq                  | 170.0x   | SPAdes v. 3.11                |
| <i>C. m. subsp. michiganensis</i>  | <i>C. michiganensis</i>  | NZ2541                 | <i>Solanum lycopersicum</i> (plant tissue) | United Kingdom  | 1962 | QODA00000000      | Contig   | 3.32 | 228 | Illumina HiSeq                  | 193.0x   | SPAdes v. 3.11                |
| <i>C. m. subsp. michiganensis</i>  | <i>C. michiganensis</i>  | NZ5026                 | <i>Solanum lycopersicum</i> (plant tissue) | USA             | 1974 | QLMT00000000      | Contig   | 3.28 | 263 | Illumina HiSeq                  | 120.0x   | SPAdes v. 3.11                |
| <i>C. m. subsp. michiganensis</i>  | <i>C. michiganensis</i>  | 1217                   | <i>Solanum tuberosum</i>                   | Russia          | 2006 | JAATPM00000000    | Scaffold | 3.31 | 227 | 454                             | 526x     | GS De Novo Assembler v. 1.1   |
| <i>C. m. subsp. michiganensis</i>  | <i>C. michiganensis</i>  | OP3                    | <i>Solanum lycopersicum</i> (plant tissue) | Chile           | 2015 | WTCS00000000      | Contig   | 3.47 | 5   | Hybrid assembly (MinION; MiSeq) | 139x     | Unicycler v. 0.4.7            |
| <i>C. michiganensis</i>            | <i>C. michiganensis</i>  | Z001                   | ?                                          | ?               | ?    | PSTW00000000      | Scaffold | 3.30 | 39  | Illumina HiSeq                  | 112.796x | SPAdes v. 3.7.0               |
| <i>C. michiganensis</i>            | <i>C. michiganensis</i>  | Z002                   | ?                                          | ?               | ?    | PSTV00000000      | Contig   | 3.32 | 44  | Illumina HiSeq                  | 160.65x  | SPAdes v. 3.7.0               |
| <i>C. m. subsp. californiensis</i> | <i>C. californiensis</i> | CFBP 8216 <sup>T</sup> | <i>Solanum lycopersicum</i> (seeds)        | California, USA | 2000 | CP040792-CP040794 | Complete | 3.26 | -   | PacBio RSII                     | 712.0x   | HGAP v. 4                     |
| <i>C. michiganensis</i>            | <i>C. californiensis</i> | AY1B2 <sup>¥</sup>     | <i>Lolium perenne</i> (ryegrass)           | Oregon, USA     | 2013 | PSTR00000000      | Scaffold | 3.34 | 42  | Illumina HiSeq                  | 165.811x | SPAdes v. 3.11.1              |
| <i>C. m. subsp. capsici</i>        | <i>C. capsici</i>        | PF008 <sup>T</sup>     | <i>Capsicum annuum</i> (plant stem)        | South Korea     | 1999 | NZ_CP012573       | Complete | 3.24 | -   | PacBio                          | 67.41x   | SMRT Analysis Portal v. 2.2.0 |
| <i>C. m. subsp. capsici</i>        | <i>C. capsici</i>        | 1101                   | <i>Capsicum annuum</i> (plant stem)        | South Korea     | 1997 | NZ_CP048049       | Complete | 3.19 | -   | PacBio RSII                     | 125.04x  | HGAP v. 2                     |
| <i>C. m. subsp. capsici</i>        | <i>C. capsici</i>        | 1106                   | <i>Capsicum annuum</i> (plant stem)        | South Korea     | 1997 | NZ_CP048047       | Complete | 3.19 | -   | PacBio RSII                     | 296.02x  | HGAP v. 2                     |
| <i>C. m. subsp. capsici</i>        | <i>C. capsici</i>        | 1207                   | <i>Capsicum annuum</i> (plant stem)        | South Korea     | 1997 | CP048045          | Complete | 3.25 | -   | PacBio RSII                     | 224.88x  | HGAP v. 2                     |
| <i>C. michiganensis</i>            | <i>C. capsici</i>        | CFBP 7576 <sup>¥</sup> | <i>Solanum lycopersicum</i> (seeds)        | ?               | 1997 | MDJX00000000      | Scaffold | 3.39 | 374 | Illumina HiSeq                  | 90.0x    | SPAdes v. 3.6                 |
| <i>C. m. subsp. phaseoli</i>       | <i>C. chilensis</i>      | LPPA 982 <sup>T</sup>  | <i>Phaseolis vulgaris</i> L. (seeds)       | Spain           | 2009 | CP040786-CP040787 | Complete | 3.23 | -   | PacBio RSII                     | 468.0x   | HGAP v. 4                     |

|                                   |                        |                         |                                         |                |      |                   |          |      |      |                                        |        |                                                              |
|-----------------------------------|------------------------|-------------------------|-----------------------------------------|----------------|------|-------------------|----------|------|------|----------------------------------------|--------|--------------------------------------------------------------|
| <i>C. m. subsp. michiganensis</i> | <i>C. chilensis</i>    | CFBP 8217 <sup>†</sup>  | <i>Solanum lycopersicum</i> (seeds)     | Chile          | 2007 | CP040795-CP040796 | Complete | 3.22 | -    | PacBio RSII                            | 373.0x | HGAP v. 4                                                    |
| <i>C. m. subsp. phaseoli</i>      | <i>C. chilensis</i>    | VKM Ac-2886             | <i>Sambucus racemosa</i> (plant tissue) | Moscow, Russia | 2017 | JADKRP00000000    | Scaffold | 3.36 | 21   | Illumina NovaSeq                       | 785x   | SPAdes v. 3.14.1                                             |
| <i>C. michiganensis</i>           | <i>C. chilensis</i>    | CFBP 7491<br>¥          | <i>Solanum lycopersicum</i> (seeds)     | ?              | ?    | QWEB00000000      | Contig   | 3.29 | 921  | Illumina HiSeq                         | 6.0x   | Velvet v. 1.2.10 ; SOAPdenovo v. 2.04; SOAPGapCloser v. 1.12 |
| <i>C. m. subsp. insidiosus</i>    | <i>C. insidiosus</i>   | LMG 3663 <sup>†</sup>   | <i>Medicago sativa</i>                  | USA            | 1955 | MZMO00000000      | Contig   | 3.39 | 3    | PacBio                                 | 458.0x | Celera Assembler v. 1                                        |
| <i>C. m. subsp. insidiosus</i>    | <i>C. insidiosus</i>   | R1-1                    | <i>Medicago truncatula</i> (plant stem) | Minnesota, USA | 2009 | NZ_CP011043       | Complete | 3.41 | -    | PacBio RSII SMRT P6-C4, Illumina GAIIx | 163.4x | HGAP3 v. 2.2, Pilon v. 1.10                                  |
| <i>C. m. subsp. insidiosus</i>    | <i>C. insidiosus</i>   | R1-3                    | <i>Medicago truncatula</i> (plant stem) | Minnesota, USA | 2009 | NZ_CP021034       | Complete | 3.39 | -    | PacBio RSII                            | 120x   | HGAP3 PacBio SMRT portal v. 2.2.0                            |
| <i>C. m. subsp. insidiosus</i>    | <i>C. insidiosus</i>   | ATCC 10253              | <i>Medicago sativa</i>                  | Kansas, USA    | 1960 | NZ_CP021038       | Complete | 3.24 | -    | PacBio RSII                            | 117x   | HGAP3 SMRT portal v. 2.2.0                                   |
| <i>C. m. subsp. insidiosus</i>    | <i>C. insidiosus</i>   | CFBP 1195               | <i>Medicago sativa</i>                  | United Kingdom | 1964 | QWDZ00000000      | Contig   | 3.20 | 805  | Illumina HiSeq                         | 6.0x   | Velvet v. 1.2.10; SOAPdenovo v. 2.04; SOAPGapCloser v. 1.12  |
| <i>C. m. subsp. insidiosus</i>    | <i>C. insidiosus</i>   | CFBP 6488<br>φ          | <i>Medicago sativa</i>                  | Czech Republic | 1998 | QWEA00000000      | Contig   | 3.23 | 1892 | Illumina HiSeq                         | 6.0x   | Velvet v. 1.2.10; SOAPdenovo v. 2.04; SOAPGapCloser v. 1.12  |
| <i>C. m. subsp. insidiosus</i>    | <i>C. insidiosus</i>   | CFBP 2404 <sup>†</sup>  | <i>Medicago sativa</i>                  | USA            | 1955 | RDQV00000000      | Scaffold | 3.29 | 73   | Illumina HiSeq                         | 200.0x | Velvet v. 1.2.02; SOAPdenovo v. 2.04                         |
| <i>C. michiganensis</i>           | <i>Clavibacter</i> sp. | CFBP 7494<br>¥          | <i>Solanum lycopersicum</i> (seeds)     | ?              |      | MDJW00000000      | Contig   | 3.31 | 15   | Illumina HiSeq                         | 70.0x  | SPAdes v. 3.6                                                |
| <i>C. m. subsp. nebraskensis</i>  | <i>C. nebraskensis</i> | NCPBB 2581 <sup>†</sup> | <i>Zea mays</i>                         | Nebraska, USA  | 1974 | NC_020891         | Complete | 3.06 | -    |                                        |        |                                                              |

|                                  |                        |                         |                                     |                  |      |                   |          |      |      |                  |        |                                                             |
|----------------------------------|------------------------|-------------------------|-------------------------------------|------------------|------|-------------------|----------|------|------|------------------|--------|-------------------------------------------------------------|
| <i>C. m. subsp. nebraskensis</i> | <i>C. nebraskensis</i> | HF4                     | <i>Zea mays</i>                     | Iowa, USA        | 2012 | NZ_CP033721       | Complete | 3.06 | -    | PacBio           | 90.0x  | HGAP v. can v. 1.5                                          |
| -                                | <i>C. nebraskensis</i> | A6096                   | <i>Zea mays</i>                     | Nebraska, USA    | 1971 | CP040797          | Complete | 3.07 | -    | PacBio RSII      | 289.0x | HGAP v.4                                                    |
| <i>C. m. subsp. nebraskensis</i> | <i>C. nebraskensis</i> | 61-1                    | <i>Zea mays</i>                     | Iowa, USA        | 2006 | NZ_CP033723       | Complete | 3.07 | -    | PacBio           | 138.0x | Canu v. 1.5                                                 |
| <i>C. m. subsp. nebraskensis</i> | <i>C. nebraskensis</i> | 7580                    | <i>Zea mays</i>                     | Iowa, USA        | 2006 | NZ_CP033722       | Complete | 3.07 | -    | PacBio           | 236.0x | HGAP v. Can v. 1.5                                          |
| <i>C. m. subsp. nebraskensis</i> | <i>C. nebraskensis</i> | CFBP 7577<br>ϕ          | <i>Zea mays</i>                     | ?                | 2011 | QWED00000000      | Contig   | 2.98 | 1272 | Illumina HiSeq   | 6.0x   | Velvet v. 1.2.10; SOAPdenovo v. 2.04; SOAPGapCloser v. 1.12 |
| <i>C. m. subsp. nebraskensis</i> | <i>C. nebraskensis</i> | DOAB 395                | <i>Zea mays</i>                     | Manitoba, Canada | 2014 | LSOE00000000      | Contig   | 3.08 | 25   | Illumina         | 110x   | ABYSS v. 1.5.2                                              |
| <i>C. m. subsp. nebraskensis</i> | <i>C. nebraskensis</i> | DOAB 397                | <i>Zea mays</i>                     | Manitoba, Canada | 2014 | LAKL00000000      | Contig   | 3.06 | 28   | Illumina MiSeq   | 89.0x  | ABYSS v. 1.5.2                                              |
| <i>C. m. subsp. sepedonicus</i>  | <i>C. sepedonicus</i>  | ATCC 33113 <sup>T</sup> | <i>Solanum tuberosum</i>            | Canada           | 1980 | NC_010407         | Complete | 3.40 | -    | Sanger AB 3700   | 8x     | PHRAP, Gap4                                                 |
| <i>C. m. subsp. sepedonicus</i>  | <i>C. sepedonicus</i>  | CFIA-Cs3N               | <i>Solanum tuberosum</i>            | Canada           | ?    | MZMM00000000      | Contig   | 3.36 | 5    | PacBio           | 536.0x | Celera Assembler v. 1                                       |
| <i>C. m. subsp. sepedonicus</i>  | <i>C. sepedonicus</i>  | CFIA-CsR14              | <i>Solanum tuberosum</i>            | Canada           | ?    | MZMN00000000      | Contig   | 3.41 | 6    | PacBio           | 537.0x | Celera Assembler v. 1                                       |
| <i>C. m. subsp. tessellarius</i> | <i>C. tessellarius</i> | ATCC 33566 <sup>T</sup> | <i>Triticum aestivum</i>            | Nebraska, USA    | 1978 | CP040788-CP040791 | Complete | 3.37 | -    | PacBio RSII      | 574.0x | HGAP v.4                                                    |
| <i>C. michiganensis</i>          | <i>C. tessellarius</i> | CFBP 3399<br>¥          | <i>Tulipa sp.</i>                   | Netherlands      | 1987 | JAHEWV00000000    | Contig   | 3.26 | 68   | Illumina NovaSeq | 257.0x | SPAdes v. 3.15.2                                            |
| <i>C. m. subsp. tessellarius</i> | <i>Clavibacter sp.</i> | DOAB 609<br>¥           | <i>Triticum aestivum</i> (leaves)   | Nebraska, USA    | 1976 | LQXA00000000      | Contig   | 3.30 | 61   | Illumina MiSeq   | 380.0x | ABYSS v. 1.5.2                                              |
| <i>C. michiganensis</i>          | <i>Clavibacter sp.</i> | CFBP 8017<br>¥          | <i>Solanum lycopersicum</i> (seeds) | Netherlands      | 2006 | MDJY00000000      | Contig   | 3.17 | 65   | Illumina HiSeq   | 90.0x  | SPAdes v. 3.6                                               |
| <i>C. zhangzhii</i>              | <i>C. zhangzhii</i>    | DM1                     | <i>Hordeum vulgare</i> (seeds)      | Australia        | 2017 | NZ_CP061274       | Complete | 3.10 | -    | PacBio; Illumina | 450.0x | SMRT Link v. v5.1.0; Arrow v. v2.3.3                        |
| <i>C. zhangzhii</i>              | <i>C. zhangzhii</i>    | DM3                     | <i>Hordeum vulgare</i> (seeds)      | Australia        | 2017 | JAFEUE00000000    | Contig   | 3.02 | 684  | Illumina HiSeq   | 219.8x | Velvet v. 1.2.10                                            |
| <i>Rathayibacter toxicus</i>     | <i>R. toxicus</i>      | WAC3373<br>‡            | <i>Phalaris paradoxa</i>            | Australia        | 1978 | NZ_CP013292       | Complete | 2.35 | -    | PacBio RSII      | 99x    | HGAP                                                        |

|                    |                    |                 |                                              |      |      |             |          |      |   |        |        |                                |
|--------------------|--------------------|-----------------|----------------------------------------------|------|------|-------------|----------|------|---|--------|--------|--------------------------------|
| <i>R. iranicus</i> | <i>R. iranicus</i> | NCCPB<br>2253 ¶ | <i>Triticum<br/>aestivum</i><br>(seed heads) | Iran | 1961 | NZ_CP028130 | Complete | 3.44 | - | PacBio | 156.0x | Celera<br>Assembler v.<br>2013 |
|--------------------|--------------------|-----------------|----------------------------------------------|------|------|-------------|----------|------|---|--------|--------|--------------------------------|

† Indicates type strain of the bacterial cultures.

¶ Strains selected as outgroups for the multi-locus sequencing analysis (MLSA).

‡ Strain selected as an outgroup for the average nucleotide identity (ANI) computation and ANI-based phylogeny test.

ϕ Strains excluded from the core-genome-based phylogenomic study.

¥ strains used for taxonomy delineation assessment based on the digital DNA-DNA hybridization (dDDH) calculations as implemented in the Type Strain Genome Server (TYGS) platform.

- Non applicable.

? Unknown information.
